# Supplementary material for: Metabox: A Toolbox for Metabolomic Data Analysis, Interpretation and Integrative Exploration
Source: PubMed Central journal article supplement (PMC5283729; doi:10.1371/journal.pone.0171046), 2017-01-31
Supplement: pone.0171046.s001.pdf [file pone.0171046.s001.pdf]

**S1 Table. List of resources and type of information collected in the graph database.**

| Database              | Entity type       | Relationship type                           | Version                                  |
|-----------------------|-------------------|---------------------------------------------|------------------------------------------|
| PubChem compounds [1] | Compound          | -                                           | March 2016 (Chemical and drugs category) |
| UniProt [2]           | Protein           | -                                           | March 2016                               |
| ENSEMBL [3]           | Gene              | Conversion                                  | GRCh38.p5                                |
| KEGG                  | Compound, Pathway | Annotation, Biochemical reaction, Catalysis | 78.0                                     |
| miRTarBase            | MicroRNA          | Control                                     | 6.1                                      |
| BioGRID               | -                 | Genetic association, Molecular binding      | 3.4.134                                  |
| Pathway Commons       | -                 | Control                                     | 7.0                                      |

**References**

1. Kim S, Thiessen PA, Bolton EE, Chen J, Fu G, Gindulyte A, et al. PubChem Substance and Compound databases. *Nucleic acids research*. 2016;44(D1):D1202-13. Epub 2015/09/25. doi: 10.1093/nar/gkv951. PubMed PMID: 26400175; PubMed Central PMCID: PMC4702940.
2. UniProt C. UniProt: a hub for protein information. *Nucleic acids research*. 2015;43(Database issue):D204-12. Epub 2014/10/29. doi: 10.1093/nar/gku989. PubMed PMID: 25348405; PubMed Central PMCID: PMC4384041.
3. Cunningham F, Amode MR, Barrell D, Beal K, Billis K, Brent S, et al. Ensembl 2015. *Nucleic acids research*. 2015;43(Database issue):D662-9. Epub 2014/10/30. doi: 10.1093/nar/gku1010. PubMed PMID: 25352552; PubMed Central PMCID: PMC4383879.
