# Supplementary material for: Metabox: A Toolbox for Metabolomic Data Analysis, Interpretation and Integrative Exploration
Source: PubMed Central journal article supplement (PMC5283729; doi:10.1371/journal.pone.0171046), 2017-01-31
Supplement: pone.0171046.s002.pdf [file pone.0171046.s002.pdf]

**S2 Table. List of nodes and relationships.**

| <b>Nodes</b>         |                                                                                                               |
|----------------------|---------------------------------------------------------------------------------------------------------------|
| Compound             | Small molecules including all metabolites and drugs                                                           |
| Gene                 | A region of DNA encoding a functional product that can be inherited through DNA replication                   |
| Pathway              | A set of interactions forming a network                                                                       |
| Protein              | A sequence of amino acids                                                                                     |
| RNA                  | A sequence of ribonucleotides                                                                                 |
| <b>Relationships</b> |                                                                                                               |
| ANNOTATION           | Assigning a defined concept to an entity                                                                      |
| BIOCHEMICAL_REACTION | An interaction involving substrates and their products                                                        |
| CATALYSIS            | An interaction involving a catalyst and molecular entities of the catalyzed reaction                          |
| CONTROL              | A controller regulates, modifies, or influences the other (a controlled)                                      |
| CONVERSION           | An entity is transformed to another entity                                                                    |
| GENETIC_ASSOCIATION  | Considering gene-gene interactions when genetic perturbations of both genes have a combined phenotypic effect |
| MOLECULAR_BINDING    | An interaction involving molecular contact between entities                                                   |

Adopted from Biological pathways exchange (BioPAX) [1]

## References

1. Demir E, Cary MP, Paley S, Fukuda K, Lemer C, Vastrik I, et al. The BioPAX community standard for pathway data sharing. *Nature biotechnology*. 2010;28(9):935-42. Epub 2010/09/11. doi: 10.1038/nbt.1666. PubMed PMID: 20829833; PubMed Central PMCID: PMC3001121.
