# Supplementary material for: Metabox: A Toolbox for Metabolomic Data Analysis, Interpretation and Integrative Exploration
Source: PubMed Central journal article supplement (PMC5283729; doi:10.1371/journal.pone.0171046), 2017-01-31
Supplement: pone.0171046.s005.pdf [file pone.0171046.s005.pdf]

# metabox: a toolbox for metabolomic data analysis, interpretation and integrative exploration

Kwanjeera Wanichthanarak, Sili Fan, Dmitry Grapov, Dinesh Barupal and Oliver Fiehn

9 January 2017

## TUTORIALS

A collection of tutorials for using metabox is provided here to illustrate important features of metabox. These tutorials are corresponding to Results and Discussion section of the main manuscript.

### 0. Example data sets

The example data sets are based on the published studies about lung adenocarcinoma (transcriptomic data (1) and metabolomic data (2)).

The metabolomic data set containing 39 malignant and adjacent non-malignant lung tissue samples was measured by gas chromatography time-of-flight mass spectrometry (GC-TOF-MS) (2) and pre-processed by the BinBase database (3). 462 compounds were measured, 171 of which have associated PubChem CID. This metabolomic data set was prepared in the input format used in metabox, which is in *metabolomics.xlsx*.

Metabox was used for the statistical analysis comparing tumor and control tissues. For users' convenience, we filtered the list of significantly different compounds comparing tumor and control tissues from the analysis result and provided in *pubchem\_stats.txt*.

The transcriptomic data, GEO accession: GSE32863 (1), contain gene expression profiles of 58 lung adenocarcinoma and adjacent non-malignant lung tissues using Illumina HumanWG-6 v3.0 expression BeadChip platform. Differential gene expression analysis comparing lung adenocarcinoma and adjacent non-malignant lung tissues was performed with GEO2R (4). P-values were adjusted with Benjamini and Hochberg false discovery rate at 5% (pFDR < 0.05). Differential gene expression analysis comparing tumor and control tissues reported 171 out of 21,204 genes in which pFDR < 0.05 and  $|\log_2FC| > 2$ . For users' convenience, we filtered the list of significantly different genes comparing tumor and control tissues from the analysis result and provided in *ensembl\_stats.txt*.

**Table 1. List of example data sets**

| File              | Description                                                                                                       | Input of section |
|-------------------|-------------------------------------------------------------------------------------------------------------------|------------------|
| metabolomics.xlsx | Metabolic profiles of 39 lung malignant and adjacent non-malignant tissues pre-processed by the BinBase database. | Section 2        |
| pubchem_stats.txt | Multi-column table of significant compounds and associated statistical values computed by metabox.                | Section 3        |
| ensembl_stats.txt | Multi-column table of filtered genes and associated statistical values computed by GEO2R.                         | Section 3        |

## 1. Load required libraries and run the metabox using R-terminal

```
## Load library
> library(metabox)
> library(opencpu)

## Run metabox on a web browser
> opencpu$browse('library/metabox/www')
```

## 2. Using metabox for in-depth analysis of metabolomic data

This tutorial shows that metabox is used for deep analysis (data processing, statistical analysis, metabolic network construction and functional interpretation) of metabolomic data. The example metabolomic data set is in *metabolomics.xlsx*. It is uploaded to metabox for log transformation before statistical analysis using paired t-test (Fig 1). The output from the data normalization and the statistical analysis is transferred to the network construction part to calculate the chemical structure similarity network of the PubChem compounds. The default threshold of correlation coefficient  $> 0.7$  was used. The resulting network is enhanced by further mapping with annotation information. In this case, we applied Functional class scoring option to estimate significantly enriched pathways of network nodes by taking metabolic profiles in to account (see Fig 2 for all the steps).

Alternatively, the output from statistical analysis can be passed to one of the functional analysis method to aid interpretation of measured compounds. In this case, we applied WordCloud option to quickly summarize KEGG pathways of the compounds (see Fig 3 for all the steps). The top ten categories of measured compounds include Central carbon metabolism in cancer, Protein digestion and absorption, Aminoacyl-tRNA biosynthesis, Purine metabolism, Pyrimidine metabolism, Glyoxylate and dicarboxylate metabolism, Arginine and proline metabolism, Pentose and glucuronate interconversions, Galactose metabolism and Fatty acid biosynthesis sorted by the number of compounds in each category. This example shows that after statistical analyses, the result can be interpreted with pathway information.

## 3. Integrative exploration of significant genes and compounds in biological network context

Metabox is used for joint exploration of the lists of significant genes and compounds from comparisons between tumor and non-tumor tissues in the context of biological networks. The *ensembl\_stats.txt* and *pubchem\_stats.txt* are used to construct the biological network outlining relationships between genes and compounds as *(:Protein)-[:CONTROL]->(from:Gene)-[:CONVERSION]->(to:Protein)-[:CATALYSIS]->(to:Compound)*. The resulting network including all attributes can be downloaded for advance exploration using visualization software such as Cytoscape (5). Fig 4 shows all the steps to construct the network with metabox.

# FIGURES

## Statistics

Upload Data

Sheet Name: *The first sheet will be read as default. Click me to change.*

Upload A File:

If you want to upload a new file, please refresh the page first.

1. Upload an Excel File.  
If need, enter a sheet name in the Excel file otherwise the first sheet will be used as default.

| feature_index | KnownorUnknown | ret_index | quant_mz | PubChem |
|---------------|----------------|-----------|----------|---------|
| 1             | TRUE           | 566749    | 217      | 6912    |
| 2             | TRUE           | 924754    | 325      | 64959   |
| 3             | TRUE           | 702391    | 353      | 1188    |
| 6             | TRUE           | 309905    | 144      | 6287    |
| 7             | TRUE           | 979035    | 352      | 6030    |
| 8             | TRUE           | 856953    | 258      | 6029    |
| 9             | TRUE           | 730534    | 441      | 1175    |
| 10            | TRUE           | 331223    | 171      | 1176    |
| 11            | TRUE           | 385903    | 99       | 1174    |
| 12            | TRUE           | 586393    | 217      | 17473   |
| 13            | TRUE           | 623732    | 326      | 445675  |
| 14            | TRUE           | 670602    | 218      | 6057    |
| 15            | TRUE           | 779834    | 202      | 6305    |

Showing 1 to 462 of 462 entries

**Fig 1. Data normalization and statistical analysis comparing two-paired groups of metabolomic study.**

Principal Component Analysis

1. Sample Normalization  
2. Data Transformation  
3. Feature Normalization

2. Select data processing methods and Click Apply.  
Use PCA score plot to visualize the output

Use Lasso Select to select points you are interested e.g. outliers and Donut plot will display information of them.

Information of Selected Samples

Remove Following Samples:

Download Normalized Data

Normalized data can be downloaded here

Use dropdown to choose information to display  
Fill in sample id(s) that will be removed and Click Apply

Study Design

Experiment Factor: Nothing selected

Repeat Measure Factor: Condition

Sample Size: N T 39 39

3. Select factor to be compared  
Statistical methods will automatically be chosen.  
Click Submit! to compute

Result Table

Parametric  
Use paired t test on factor Condition, with a Benjamini & Hochberg (1995) adjustment, to compare N and T.  
To choose other method, Click method name

nonpara-Parametric  
Use Wilcoxon Signed-Rank Test on factor Condition, with a Benjamini & Hochberg (1995) adjustment, to compare N and T.

| PubChem | outlier exist? | p_value_N_vs_T | fdr_adjusted_p_value_N_vs_T | _non_parametric |
|---------|----------------|----------------|-----------------------------|-----------------|
| 6912    | false          | 0.0001         | 0.0016                      | 0.0002          |
| 64959   | true           | 0.7192         | 0.8296                      | 0.6046          |
| 1188    | true           | 0              | 0.0006                      | 0               |
| 6287    | false          | 0.9584         | 0.9647                      | 0.8739          |
| 6030    | true           | 0.4893         | 0.6458                      | 0.4185          |
| 6029    | true           | 0.0003         | 0.0032                      | 0.0001          |
| 1175    | true           | 0.0058         | 0.0252                      | 0.0015          |
| 1176    | true           | 0.5425         | 0.6811                      | 0.9833          |
| 1174    | false          | 0.0103         | 0.0396                      | 0.0082          |
| 17473   | false          | 0.002          | 0.0112                      | 0.0019          |
| 445675  | false          | 0.0000030082   | 0.0001                      | 0.0000011597    |
| 6057    | true           | 0.2961         | 0.456                       | 0.329           |
| 6305    | true           | 0.8721         | 0.9202                      | 0.889           |
| 7618    | true           | 0.0004         | 0.0044                      | 0.0005          |
| 7427    | true           | 0.4226         | 0.5742                      | 0.2767          |
| 5810    | true           | 0.0016         | 0.0097                      | 0.0025          |
| 14985   | true           | 2.093e-8       | 0.0000025231                | 1.2901e-7       |

Showing 1 to 462 of 462 entries

Download Statistical Analysis Result *Click to download the result or choose further analysis option*

FrClassScoring Overrepresentation WordCloud Similarity

17 TRUE 1067178 237 14985 true

Showing 1 to 462 of 462 entries

Download Statistical Analysis Result

1. Choose Similarity

FnClassScoring Overrepresentation WordCloud Similarity

Fig 2. Computing chemical similarity network and performing FnClassScoring on network nodes.

Compute chemical-structure similarity network

Compute chemical structure similarity network

Inputs

PubChem CIDs will be used for computing the similarity network.

Input summary Input data *Result of statistical analysis is show in interactive tables. PubChem column will be used to compute a network.* Input overview

Show 10 entries Search:

| x   | quant_mz | PubChem | outlier exist? | p_value_N_vs_T | fdr_adjusted_p_value_N_vs_T | _non_parametric_p_value_N_vs_T | fdr_adjusted_non_parametric |
|-----|----------|---------|----------------|----------------|-----------------------------|--------------------------------|-----------------------------|
| 217 | 6912     |         | false          | 0.0001         | 0.0016                      | 0.0002                         | 0.0024                      |
| 325 | 64959    |         | true           | 0.7192         | 0.8266                      | 0.6046                         | 0.7125                      |
| 353 | 1188     |         | true           | 0              | 0.0006                      | 0                              | 0.0007                      |
| 144 | 6287     |         | false          | 0.9584         | 0.9647                      | 0.8739                         | 0.9218                      |
| 352 | 6030     |         | true           | 0.4893         | 0.6458                      | 0.4185                         | 0.5687                      |
| 258 | 6029     |         | true           | 0.0003         | 0.0032                      | 0.0001                         | 0.0012                      |
| 441 | 1175     |         | true           | 0.0058         | 0.0252                      | 0.0015                         | 0.0097                      |
| 171 | 1176     |         | true           | 0.5425         | 0.6811                      | 0.9833                         | 0.9943                      |
| 99  | 1174     |         | false          | 0.0103         | 0.0396                      | 0.0082                         | 0.0329                      |
| 217 | 17473    |         | false          | 0.002          | 0.0112                      | 0.0019                         | 0.0115                      |

Showing 1 to 10 of 462 entries Previous 1 2 3 4 5 ... 47 Next

Minimum Tanimoto similarity correlation coefficient:

0.7

Compute 2. Use default threshold 0.7 and Click Compute

Network

Console Node Edge *Node lists and edge lists are show in interactive tables.* Summary

Show 10 entries Search:

| id  | gid    | nodename        | nodelabel | nodexref                                                            | feature_index | KnownorUnknown | ret_index | quant_mz | outlier exist? | p_value_N_vs_T | fdr_adj |
|-----|--------|-----------------|-----------|---------------------------------------------------------------------|---------------|----------------|-----------|----------|----------------|----------------|---------|
| 113 | 222656 | L-Malic acid    | Compound  | 222656 HMDB00156 C00149 CHEBI:30787 FDB001044                       |               |                |           | 69       | TRUE           |                | 4       |
| 224 | 790    | Hypoxanthine    | Compound  | 790 HMDB00157 C00262 CHEBI:17368 DB04076 FDB003949 HYPOXANTHINE     |               |                |           | 87       | TRUE           |                | 6       |
| 229 | 229    | 229             | Compound  |                                                                     |               |                |           | 151      | TRUE           |                | 5       |
| 290 | 290    | 290             | Compound  |                                                                     |               |                |           | 128      | TRUE           |                | 8       |
| 335 | 6057   | L-Tyrosine      | Compound  | 6057 HMDB00158 C00082 CHEBI:17895 DB00135 FDB000446 TYR             |               |                |           | 12       | TRUE           |                | 6       |
| 446 | 6140   | L-Phenylalanine | Compound  | 6140 HMDB00159 C00079 CHEBI:17295 DB00120 FDB014705 PHE             |               |                |           | 46       | TRUE           |                | 5       |
| 554 | 5950   | L-Alanine       | Compound  | 5950 HMDB00161 C00041 CHEBI:16977 DB00160 FDB000556 L-ALPHA-ALANINE |               |                |           | 155      | TRUE           |                | 2       |
| 664 | 145742 | L-Proline       | Compound  | 145742 HMDB00162 C00148 CHEBI:17203 DB00172 FDB000570 PRO           |               |                |           | 40       | TRUE           |                | 3       |

Network

*Network panel allows interactive visualization of the resulting network.  
To pan – click, hold and drag background  
To zoom – scroll the mouse wheel  
To select multiple nodes – press shift and drag a box around the nodes*

Network legend

Relationship type

TANIMOTO\_SIMILARITY

corr\_coef 0 1

Node type

Compound DNA Gene Pathway Protein RNA

Download network Subnetwork FnClassScoring

Function overview **3. Choose Pathway and Click FnClassScoring**

Select annotation:  Pathway  Mesh

Overrepresentation

WordCloud

Mesh annotation is available for PubChem compounds only.

Functional class scoring

Estimate enriched functional classes for the input.

Inputs

Entity lists (e.g. PubChem or uniprot or ensamb) will be used for enrichment analysis.

Input summary Input data **Result of statistical analysis is show in interactive tables.** Input overview

Show 10 entries **PubChem column and statistical values will be used to compute enriched functional classes.** Search:

| PubChem | outlier exist? | p_value_N_vs_T | fdr_adjusted_p_value_N_vs_T | _non_parametric_p_value_N_vs_T | fdr_adjusted_non_parametric_p_value_N_vs_T |
|---------|----------------|----------------|-----------------------------|--------------------------------|--------------------------------------------|
| 6912    | false          | 0.0001         | 0.0016                      | 0.0002                         | 0.0024                                     |
| 64959   | true           | 0.7192         | 0.8266                      | 0.6046                         | 0.7125                                     |
| 1188    | true           | 0              | 0.0006                      | 0                              | 0.0007                                     |
| 6287    | false          | 0.9584         | 0.9647                      | 0.8739                         | 0.9218                                     |
| 6030    | true           | 0.4893         | 0.6458                      | 0.4185                         | 0.5687                                     |
| 6029    | true           | 0.0003         | 0.0032                      | 0.0001                         | 0.0012                                     |
| 1175    | true           | 0.0058         | 0.0252                      | 0.0015                         | 0.0097                                     |
| 1176    | true           | 0.5425         | 0.6811                      | 0.9833                         | 0.9943                                     |
| 1174    | false          | 0.0103         | 0.0396                      | 0.0082                         | 0.0329                                     |
| 17473   | false          | 0.002          | 0.0112                      | 0.0019                         | 0.0115                                     |

Showing 1 to 10 of 462 entries

Entity type:  Select method:  Select annotation:  Pathway  Mesh

Mesh annotation is available for Compound only.

Select entity-level statistics:

**4. Choose method median, Select Pathway and Select column p\_value\_N\_vs\_T and Click Compute**

Network

Console Enrichment Node Edge AnnotationPair Summary

Show 10 entries **Table of analysis result, node attributes, edge lists and annotation-entity pairs are shown.** Search:

| rank | id     | gid      | nodename                                 | nodelabel | nodexref | p      | p_adj  | no_of_entities | annotation_size | member                          |
|------|--------|----------|------------------------------------------|-----------|----------|--------|--------|----------------|-----------------|---------------------------------|
| 1    | 434566 | hsa00330 | Arginine and proline metabolism          | Pathway   | hsa00330 | 0.0114 | 0.3808 | Compound (7)   | Compound (84)   | 1019,41640,9483,664,41407,37231 |
| 2    | 434555 | hsa00220 | Arginine biosynthesis                    | Pathway   | hsa00220 | 0.0224 | 0.3808 | Compound (5)   | Compound (26)   | 41407,3771,36414,4437,38891     |
| 3    | 434542 | hsa00040 | Pentose and glucuronate interconversions | Pathway   | hsa00040 | 0.0238 | 0.3808 | Compound (7)   | Compound (87)   | 39145,3771,8141,40299,35781,42  |
| 4    | 434585 | hsa00524 | Butirosin and neomycin biosynthesis      | Pathway   | hsa00524 | 0.0582 | 0.6504 | Compound (3)   | Compound (34)   | 41407,10649,919                 |
| 5    | 434573 | hsa00430 | Taurine and hypotaurine metabolism       | Pathway   | hsa00430 | 0.0869 | 0.6504 | Compound (3)   | Compound (27)   | 41407,3771,554                  |
| 6    |        |          | Ubiquinone and                           |           |          |        |        |                |                 |                                 |

Showing 1 to 10 of 48 entries

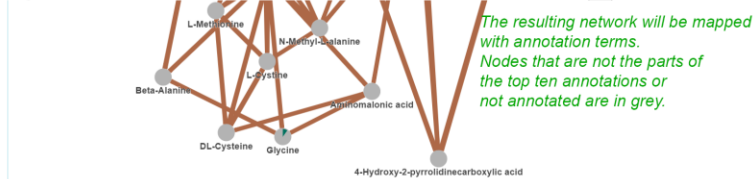

**The resulting network will be mapped with annotation terms. Nodes that are not the parts of the top ten annotations or not annotated are in grey.**

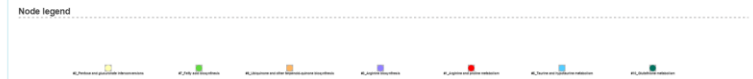

**Click Download functional analysis outputs will download results of functional analysis and the network mapped with annotation terms including corresponding legend.**

|    |      |         |     |       |      |
|----|------|---------|-----|-------|------|
| 16 | TRUE | 40567   | 156 | 5810  | true |
| 17 | TRUE | 1967176 | 237 | 14955 | true |

Showing 1 to 402 of 402 entries

[Download Statistical Analysis Result](#)

1. Choose WordCloud

[FuncClassScore](#) [ChemRepresentation](#) [WordCloud](#) [Similarity](#)

Fig 3. Computing WordCloud for measured compounds.

### Compute WordCloud

Compute WordCloud for the input.

Entity lists (e.g. PubChem or uniprot or ensembl) will be used for WordCloud generation.

Input summary: Input data: *Result of statistical analysis is shown in interactive tables. PubChem column will be used to compute WordCloud.* Input overview

Show 19 entries

| _id   | PubChem | outlier_exist | p_value_N_H_T | for_adjusted_p_value_N_H_T | _non_parametric_p_value_N_H_T | for_adjusted_non_parametric_p_value |
|-------|---------|---------------|---------------|----------------------------|-------------------------------|-------------------------------------|
| 6912  | false   | 0.0001        | 0.0016        | 0.0002                     | 0.0024                        |                                     |
| 64559 | true    | 0.7192        | 0.8266        | 0.8046                     | 0.7125                        |                                     |
| 1188  | true    | 0             | 0.0008        | 0                          | 0.0007                        |                                     |
| 6287  | false   | 0.8564        | 0.9647        | 0.8739                     | 0.9218                        |                                     |
| 8030  | true    | 0.4893        | 0.6458        | 0.4185                     | 0.5887                        |                                     |
| 8029  | true    | 0.0003        | 0.0032        | 0.0001                     | 0.0012                        |                                     |
| 1175  | true    | 0.0058        | 0.0282        | 0.0015                     | 0.0067                        |                                     |
| 1176  | true    | 0.5425        | 0.6811        | 0.9833                     | 0.9943                        |                                     |
| 1174  | false   | 0.0103        | 0.0386        | 0.0082                     | 0.0329                        |                                     |
| 17473 | false   | 0.002         | 0.0112        | 0.0019                     | 0.0115                        |                                     |

Showing 1 to 10 of 402 entries

Select annotation: Pathway Mesh  
Mesh annotation is available for Compound only.

Compute 2. Choose Pathway and Click Compute

### Outputs

Table of analysis result, node attributes and annotation-entity pairs are shown. Top ten terms are colored. Colors in the table and nodes are the same. Color legend is in the Network panel.

Console WordCloud Node AnnotationPath Summary

Show 38 entries

| rank | id     | gid      | nodename                            | nodeid  | nodefreq | freq | member                                                                            |
|------|--------|----------|-------------------------------------|---------|----------|------|-----------------------------------------------------------------------------------|
| 1    | 434820 | haa0230  | Central carbon metabolism in cancer | Pathway | haa0230  | 20   | 38680,335,39090,8207,664,446,36946,113,36858,1330,1774,38522,36414,41407,819,4062 |
| 2    | 434704 | haa04874 | Protein digestion and absorption    | Pathway | haa04874 | 18   | 38680,335,39090,666,1019,664,446,36946,1086,36858,1330,1774,38522,36414,41407,206 |
| 3    | 434595 | haa00230 | Purine metabolism                   | Pathway | haa00230 | 15   | 11428,10871,10538,11095,1052,2994,224,40518,40408,38522,36414,41308,24424,20646,  |
| 4    | 434820 | haa00970 | Aminoacyl-tRNA biosynthesis         | Pathway | haa00970 | 15   | 38680,335,39090,666,664,446,36946,1086,36858,1330,1774,38522,36414,41407,854      |
| 5    | 434558 | haa00240 | Pyrimidine metabolism               | Pathway | haa00240 | 11   | 19437,11317,11095,11038,8762,37669,5655,36414,37968,33313,36746                   |

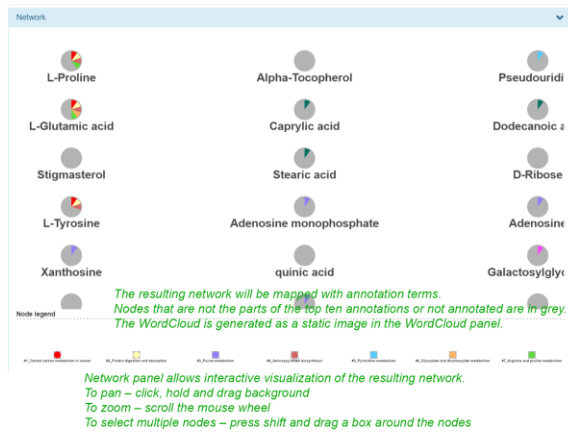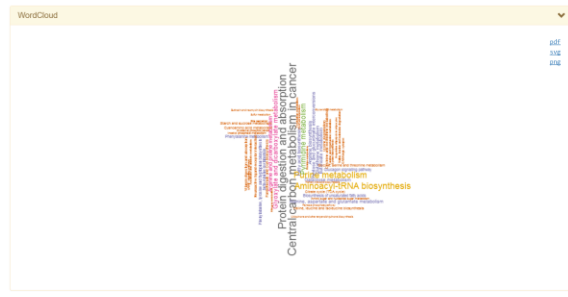

Click Download functional analysis outputs will download results of functional analysis and the network mapped with annotation terms including corresponding legend.

**Query heterogeneous network**

Query the heterogeneous network containing several relationship types from the database.

**Inputs**

**From node:**

```
ensembl adj|Pval logPFC
ENSG0000059573 5.66E-21 1.01
ENSG0000017215 4.32E-15 -1.18
ENSG0000017215 5.25E-15 -1.25
ENSG000001173081 24E-26 1.55
```

**To node:**

```
pubchem adj|Pval logPFC
532915 0.0078 -0.895239907
5312542 0.0089 0.622794737
696504 0.0053 1.139505658
445675 0.0001 1.210183601
```

**Note:**

- For one column table, separate each ID by a new line.
- For multicolun table, 1st column = ID lists with PubChem or uniprot or ensembl as a header (see below), separate each column by tab.
- Metaslab accepts PubChem CID for compounds, UniProt entry for proteins, Ensembl for genes.

**Pattern:**

{(Protein)-[:CONTROL]->(from:Gene)-[:CONVERSION]->(Protein)-[:CATALYSIS]->(to:Compound)}

**3. Construct relationship pattern as**  
 {(:Protein)-[:CONTROL]->(from:Gene)-[:CONVERSION]->(Protein)-[:CATALYSIS]->(to:Compound)}  
**and Click Query**

Type in relationship pattern or use the constructor below to define the relationship pattern (try example).

**From node:**  Compound  Protein  Gene  Pathway

**To node:**  Compound  Protein  Gene  Pathway

**Other node:**  Compound  Protein  Gene  Pathway

**Relationship:**  ANNOTATION  BIOCHEMICAL\_REACTION  CATALYSIS  CONTROL  CONVERSION  GENETIC\_ASSOCIATION  MOLECULAR\_BINDING

**Database schema**

Node lists and edge lists are show in interactive tables.

Summary

Show 50 entries

| id     | gid             | nodename                                | nodelevel | nodesref                                                                                                   |
|--------|-----------------|-----------------------------------------|-----------|------------------------------------------------------------------------------------------------------------|
| 4951   | 955             | Palmitic acid                           | Compound  | 955 HMDB002203 C00249 (CHEBI:15756) FDB011679 (CPD-8475)                                                   |
| 9316   | 91486           | Sphinganine                             | Compound  | 91486 HMDB00269 (C00836) (CHEBI:15566) FDB021924                                                           |
| 10649  | 445675          | Uridine diphosphate-N-acetylglucosamine | Compound  | 445675 HMDB00290 (C00043) (CHEBI:16264) FDB021933 (UDP-N-ACETYL-D-GLUCOSAMINE)                             |
| 39145  | 17473           | Uridine diphosphate glucuronate         | Compound  | 17473 HMDB00030 (C00167) (CHEBI:17209) FDB022325 (UDP-GLUCURONATE)                                         |
| 40299  | 753             | Glycerol                                | Compound  | 753 HMDB0131 (C00116) (CHEBI:17522) DB04077 (FDB000756) (GLYCEROL)                                         |
| 40852  | 439194          | Glyceric acid                           | Compound  | 439194 HMDB00139 (C00256) (CHEBI:32396) FDB012242 (G-PG)                                                   |
| 41467  | 33032           | L-Glutamic acid                         | Compound  | 33032 HMDB00148 (C00025) (CHEBI:18015) DB00142 (FDB012305) (GLT)                                           |
| 324822 | ENSG00000147162 | OGT                                     | Gene      | ENSG00000147162 hsa-8473 (8473) (NM_181672.2) (NM_181673.2) (XM_005262358.1) (AL059076) (BC038180) (U74)   |
| 363186 | ENSG00000175445 | LPL                                     | Gene      | ENSG00000175445 hsa-4023 (4023) (NM_000237) (AC107864) (AC100802) (S76077) (X54516) (88111) (S76076) (BTO) |

Showing 1 to 10 of 90 entries

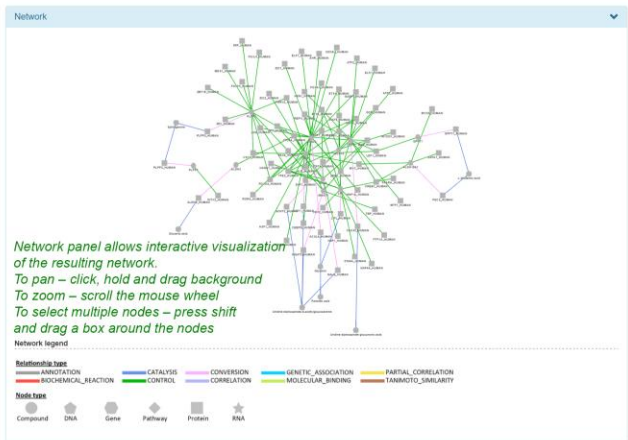

Click Download network to download node lists, edge lists and static image of the resulting network  
 Or Click other buttons to choose further analysis.

**Function overview**

Select annotation:  Pathway  Mesh

Mesh annotation is available for PubChem compounds only

**Fig 4. Constructing biological network from gene lists and compound lists. Relationship pattern between genes and compounds is:**

**{(:Protein)-[:CONTROL]->(from:Gene)-[:CONVERSION]->(Protein)-[:CATALYSIS]->(to:Compound)}**

## REFERENCES

1. Selamat SA, Chung BS, Girard L, Zhang W, Zhang Y, Campan M, et al. Genome-scale analysis of DNA methylation in lung adenocarcinoma and integration with mRNA expression. *Genome research*. 2012;22(7):1197-211.
2. Wikoff WR, Grapov D, Fahrman JF, DeFelice B, Rom WN, Pass HI, et al. Metabolomic markers of altered nucleotide metabolism in early stage adenocarcinoma. *Cancer prevention research*. 2015;8(5):410-8.
3. Fiehn O, Wohlgemuth G, Scholz M. Setup and annotation of metabolomic experiments by integrating biological and mass spectrometric metadata. *Lect Notes Comput Sc*. 2005;3615:224-39.
4. Barrett T, Wilhite SE, Ledoux P, Evangelista C, Kim IF, Tomashevsky M, et al. NCBI GEO: archive for functional genomics data sets--update. *Nucleic acids research*. 2013;41(Database issue):D991-5.
5. Shannon P, Markiel A, Ozier O, Baliga NS, Wang JT, Ramage D, et al. Cytoscape: a software environment for integrated models of biomolecular interaction networks. *Genome research*. 2003;13(11):2498-504.
